# Supplementary material for: A Ru(terpy)(phen)-incorporating ring and its light-induced geometrical changes
Source: Royal Society of Chemistry journal article supplement (doi:10.1039/b503411f), 2005-01-01
Supplement: b503411f.pdf [file b503411f.pdf]

### Supplementary material S1

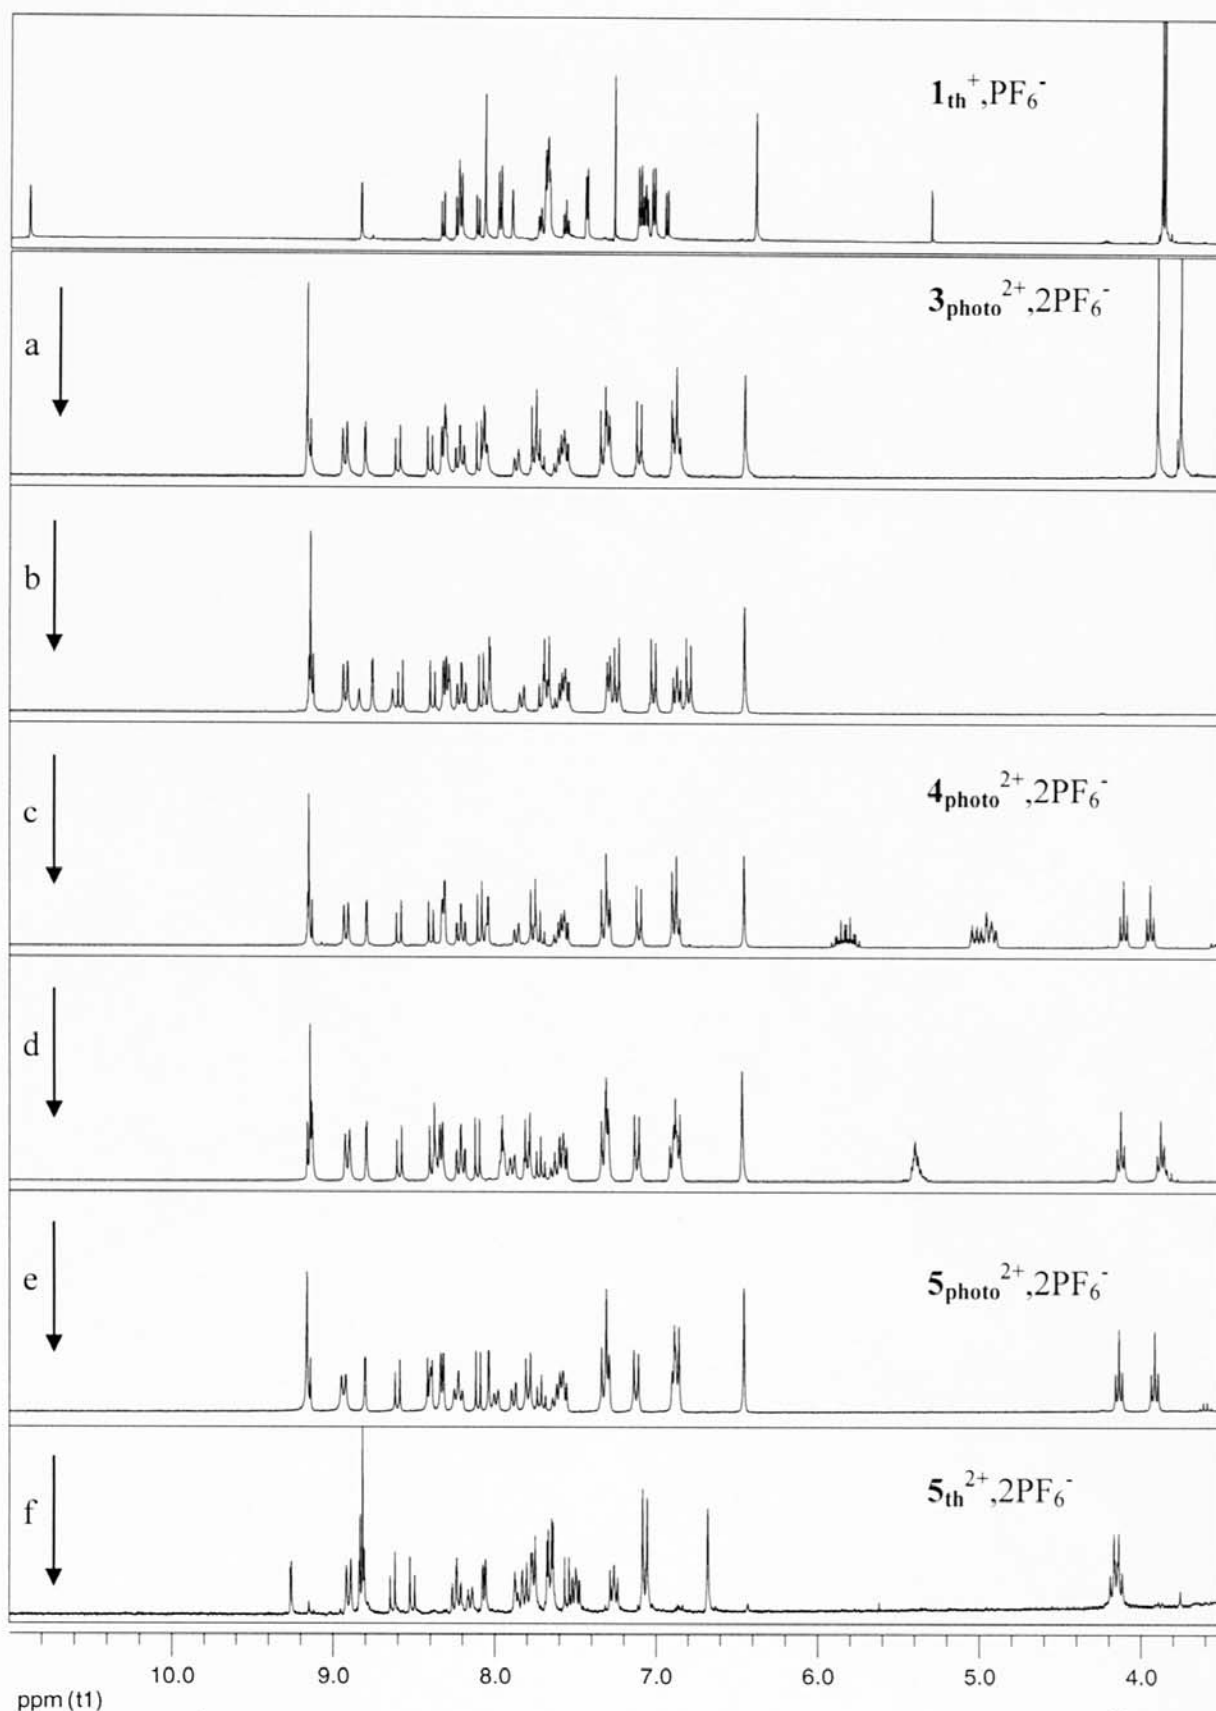

Evolution of the  $^1\text{H}$  NMR spectrum of the complexes, from  $1_{\text{th}}^+, \text{PF}_6^-$  to  $5_{\text{th}}^{2+}, 2\text{PF}_6^-$ . Scale is 11-3.5 ppm in acetone  $d_6$ . Réaction conditions: a)  $h\nu$  in  $\text{CH}_3\text{CN} / \text{H}_2\text{O}$ , then 2h reflux in  $\text{C}_5\text{H}_5\text{N}$ ; b)  $\text{BBr}_3$  in  $\text{DCM}$ ,  $-78^\circ\text{C} \rightarrow \text{RT}$  2h; c)  $\text{Br}(\text{CH}_2)_8\text{CHCH}_2$ ,  $\text{Cs}_2\text{CO}_3$  in  $\text{DMF}$ ,  $60^\circ\text{C}$  8h; d) Grubbs 1<sup>st</sup> gen. catalyst,  $\text{DCM}$  RT 48h; e)  $\text{Pd/C}$  cat.,  $\text{H}_2$  in  $\text{DCM}$  16h; f)  $\text{CH}_3\text{SOCH}_3$   $140^\circ\text{C}$  2h then  $\text{C}_5\text{H}_5\text{N}$  reflux 2h.
